# Supplementary material
Source: PubMed Central journal article supplement (PMC6474302)
Supplement: 41396_2018_330_MOESM1_ESM.pdf [file 41396_2018_330_MOESM1_ESM.pdf]

## Supplementary Information S.I. 1

**Supplementary Table S1.** Relationship between chlorophyll *a* levels of each species growing as monoculture, measured with a laboratory fluorimeter (Turner BioSystems, USA), and their density and biovolume, which were measured with a particle counter (CASY™ Roche Innovatis AG, Germany). Each regression was performed across the range of densities that were observed in our experiment. N = samples size, R<sup>2</sup> = variance explained by the regression.

| Species                           | Fluorimeter-particle counter (density) |    | Fluorimeter-particle counter (biovolume) |    |
|-----------------------------------|----------------------------------------|----|------------------------------------------|----|
|                                   | R <sup>2</sup>                         | N  | R <sup>2</sup>                           | N  |
| <i>Synechococcus leopoliensis</i> | 0.830                                  | 15 | 0.902                                    | 15 |
| <i>Synechocystis sp PCC 6803</i>  | 0.887                                  | 20 | 0.953                                    | 20 |
| <i>Synechocystis pevalekii</i>    | 0.943                                  | 15 | 0.981                                    | 15 |
| <i>Chroococcus minutus</i>        | 0.830                                  | 20 | 0.915                                    | 20 |
| <i>Chroococciopsis cubana</i>     | 0.972                                  | 13 | 0.993                                    | 13 |
| <i>Aphanothece hegewaldii</i>     | 0.833                                  | 20 | 0.943                                    | 20 |

**Supplementary Table S2.** Comparison of monoculture counts of each species used in the experiment when counted under a light microscope, or on the particle counter (CASY™ Roche Innovatis AG, Germany). Each regression was performed across the range of densities that were observed in our experiment. N = samples size, R<sup>2</sup> = variance explained by the regression.

| Species                           | R <sup>2</sup> | N  |
|-----------------------------------|----------------|----|
| <i>Synechococcus leopoliensis</i> | 0.998          | 7  |
| <i>Synechocystis sp PCC 6803</i>  | 0.999          | 8  |
| <i>Synechocystis pevalekii</i>    | 0.999          | 8  |
| <i>Chroococcus minutus</i>        | 1.000          | 10 |
| <i>Chroococciopsis cubana</i>     | 0.891          | 8  |
| <i>Aphanothece hegewaldii</i>     | 0.886          | 7  |

## **Supplementary Information S.I. 2**

**Supplementary Figure S1.** Maximum Likelihood phylogeny constructed using RAxML version 7.2.8 (Stamatakis et al 2008). This molecular phylogeny includes 23 common freshwater cyanobacterial species estimated using partial 16S ribosomal RNA sequences and *Bacillus subtilis* strain B6-1 as outgroup, all available on GenBank. We aligned gene sequences with ClustalX2 (Neighbour-joining distance method) and excluded positions with gaps and correcting for multiple substitutions. Species used in this experiment are underlined in red.

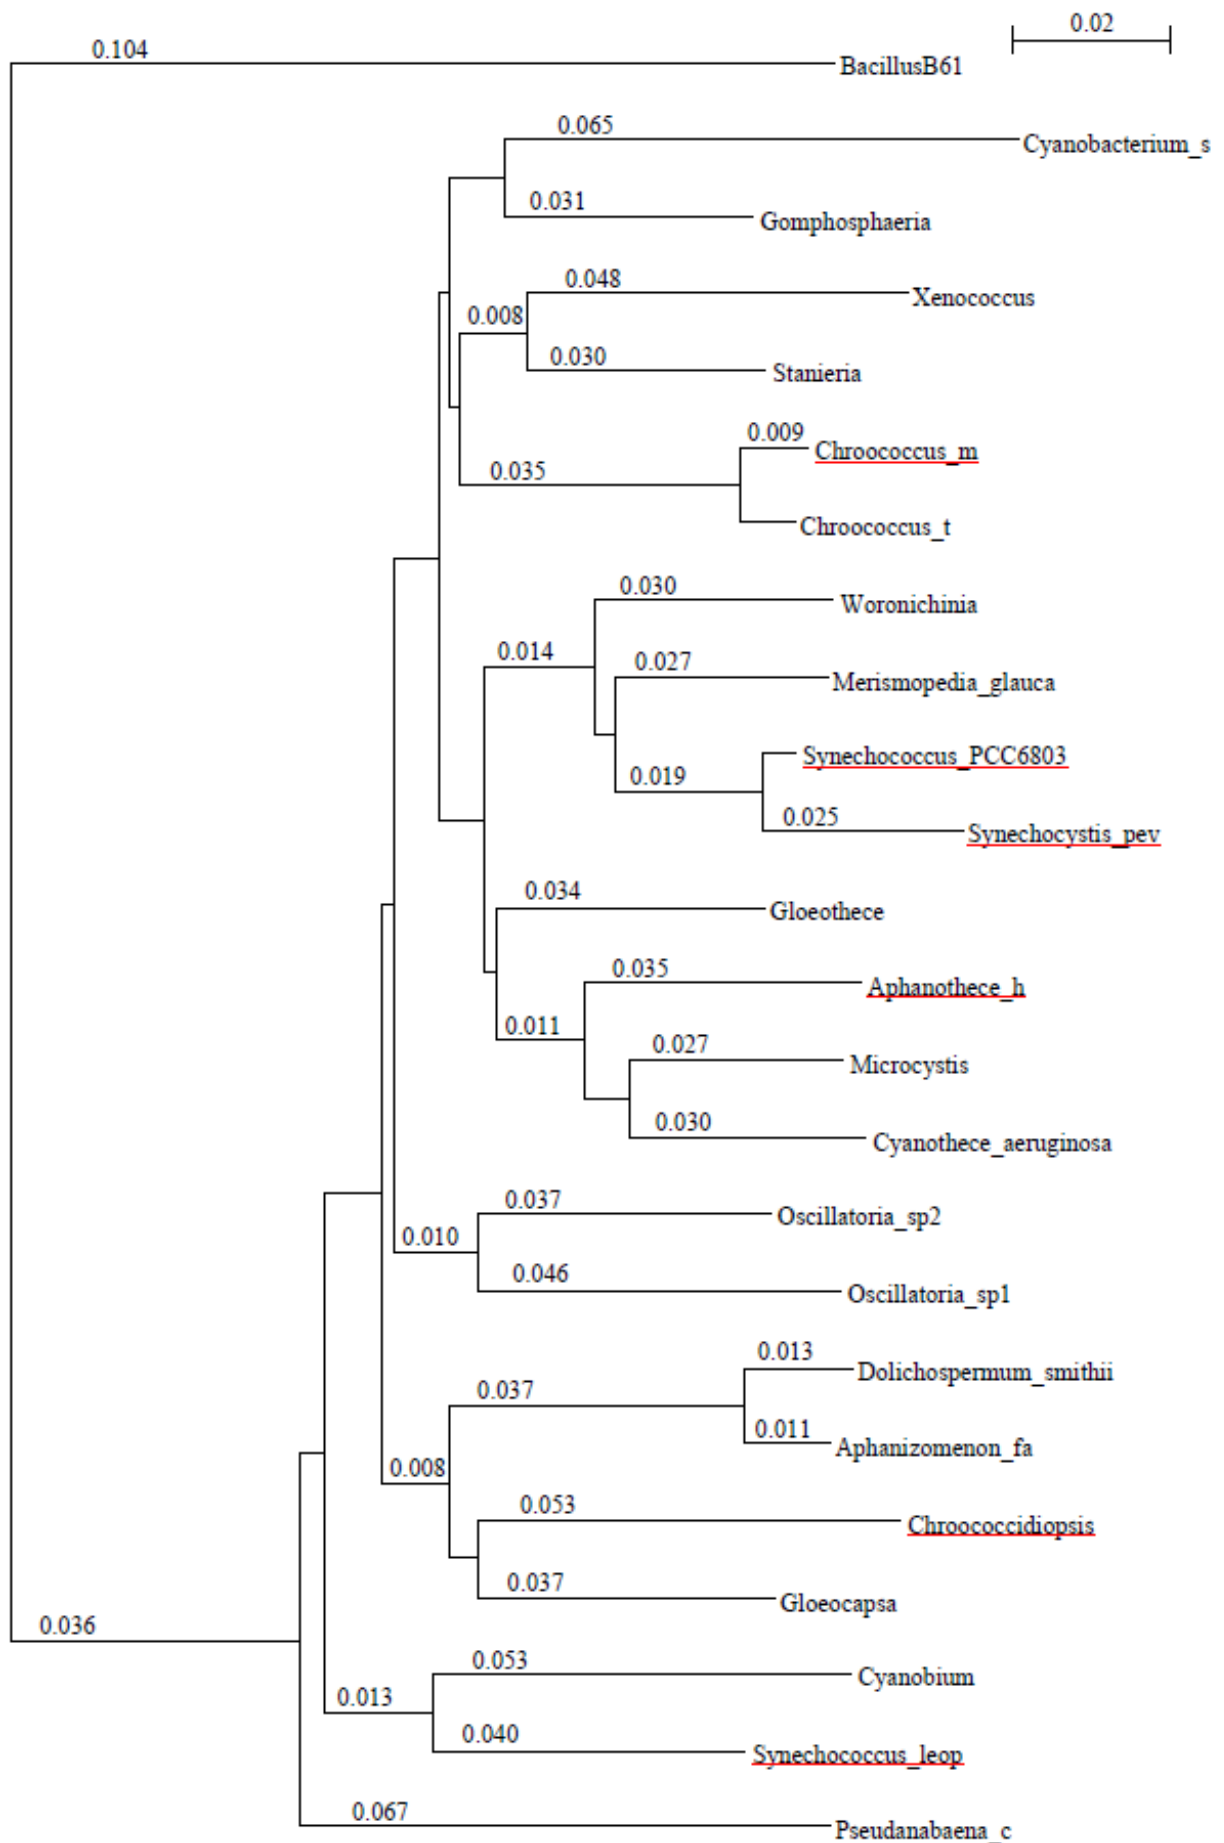

### Supplementary Information S.I. 3

**Supplementary Figure S3.** Relationship between cyanobacterial size differences ( $\mu\text{m}$ ) and phylogenetic distance, for each pairwise combination ( $N = 15$ ). No correlation was found between the two variables ( $R^2 = 0.05$ ,  $P = 0.4$ ).

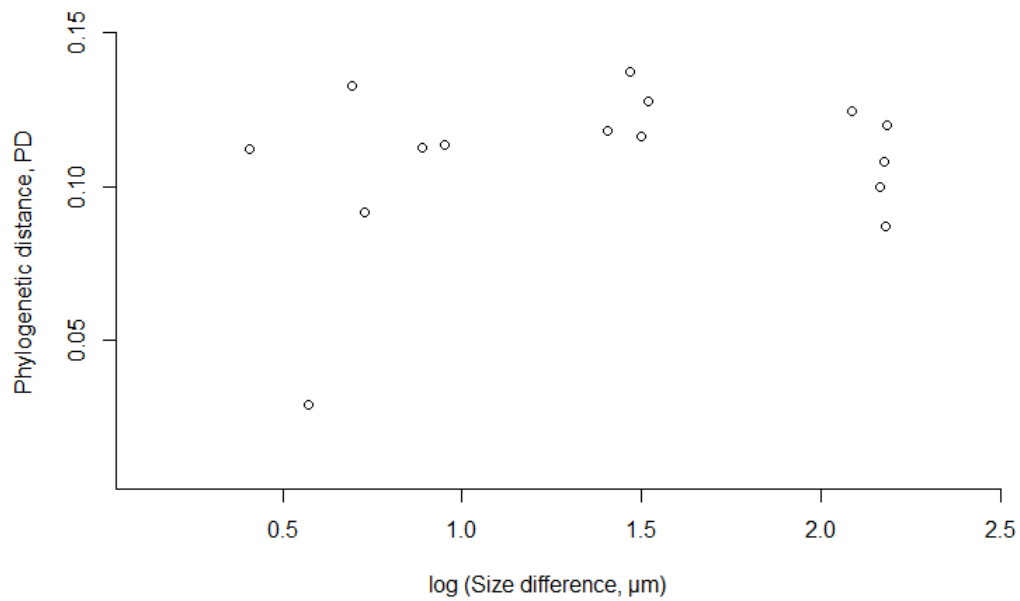

### References

Stamatakis, A., Hoover, P. & Rougemont, J. (2008). A Rapid Bootstrap Algorithm for the RAxML Web Servers. *Syst. Biol.*, **57**, 758–771.
